# Supplementary material for: Power-law behavior of transcriptional bursting regulated by enhancer–promoter communication
Source: HighWire-hosted journal article supplement (doi:10.1101/gr.278631.123), 2024-01-01
Supplement: Supplemental_Figures.docx [file Supplemental_Figures.docx]

**Supplemental Figure S1. Distributions and properties of upstream E-P spatial distance.**

**(A)** Influence of and on the distribution of E-P spatial distance (Maxwell-Boltzmann distribution, Eq. (14) in Supplemental Text) where red lines represent theoretical results, histograms represent numerical results. **(B)** Experimental measurement of 3D spatial distance between *Sox2* and the SCR enhancer in living ESCs (Ref. [41] in Supplemental Text). The blue line is obtained by fitting the Maxwell-Boltzmann distribution. **(C)** Cumulative density function (CDF) of E-P spatial distance (Eq. (55) in Supplemental Text) for different (left, fixed ) and (right, fixed ). **(D)**  as a function of (left, fixed and ) and (right, fixed and ). **(E)** Encounter probability as a function of mean spatial distance (left) and (right). Blue points are obtained by theoretical calculation, whereas solid lines represent power-law fitting. Only the points with are fitted by power-law. **(F)** Influence of Lennard-Jones (LJ) potential well depth and on probability density function of where histograms represent numerical results and red lines represent fitting results by Maxwell-Boltzmann distribution (parameter is ). LJ potential is , where is a distance parameter, is the depth of the potential well representing the strength of attraction between two particles, and is a modified distance. Other parameters are the default values as in Supplemental Table S[2](#SITable2).

**Supplemental Figure S2. Distributions and properties of downstream transcriptional bursting.**

**(A)** Schematic for enhancer deletion (i.e., ). In this case, the transcriptional burst rates are always minimums. **(B-E)** Probability distributions of burst size (F), cycle time (G), OFF dwell time (H) and ON dwell time (I) when (enhancer deletion. That is without E-P regulatory). The red solid lines represent theoretical results. The histograms represent the results obtained by numerical simulations. **(F)** Influences of different values of on and . The red dashed line represents the approximate linear relationship between and without considering enhancer deletion. And this line’s slope, obtained by calculating the ratio of slope (Eq. (77) in Supplemental Text) between and (Eq. (67) in Supplemental Text, ) over the slope between and (), is . The red solid line represents the approximate linear relationship between and when and the line slope is . The dashed gray line is the indicator of the slope equaling 1. Other parameters are the default values as in Supplemental Table S[2](#SITable2).

**Supplemental Figure S3. The effect of upstream and downstream timescales on downstream distributions, where OFF distribution is taken as an example for demonstration.**

**(A)** The maximum achievable ratio of upstream and downstream timescales is a function of minimum state switching rates and E-P communication strength . **(B)** The is a function of minimum transcriptional rate and drag coefficient . **(C-F)** Blue solid lines represent the , whereas red solid lines represent the . The histograms represent the results obtained by numerical simulations. **(C-D)** Upstream chromatin fluctuations are much faster compared with the downstream state switching rates. Parameter values are set as , , , , . **(E-F)** Upstream chromatin fluctuations are slow. Parameter values are set as , , , , . Other parameters are the default values as in Supplemental Table S[2](#SITable2).

**Supplemental Figure S4. Distributions of whole system’s burst size, cycle time, ON time and OFF time.**

**(A-D)** CDF of burst size (A), cycle time (B), ON time (C) and OFF time (D) for different (left, fixed ) and (right, fixed ) under the E-P regulation. **(E-H)** Probability distributions of burst size (E), cycle time (F), OFF dwell time (G) and ON dwell time (H) where numerical simulation results correspond to grey histograms whereas analytical results to solid lines. Parameter values in (E-H) are set as , . Other parameters are the default values as in Supplemental Table S[2](#SITable2).

**Supplemental Figure S5. Rationality and validity of power-law approximations for transcriptional burst kinetics.**

**(A-C)** Derivatives (Eq. (63) in Supplemental Text) and (Eq. (65) in Supplemental Text) as the functions of parameters and (A), (B), (C). The bottom of (B) is a magnified display of a portion of the top of (B). **(D-E)** and as the functions of , where green dashed lines represent theoretical result, orange solid lines represent binary approximation (Eq. (60) in Supplemental Text), and red solid lines represent power-law approximation (Eqs. (69) and (70) in Supplemental Text). **(F-H)** Derivatives and (Eq. (71) in Supplemental Text) as the functions of parameter and (F), (G), (H). The bottom of (G) is a magnified display of a portion of the top of (G). **(I-J)** and as the functions of , where green dashed lines represent theoretical result, orange solid lines represent binary approximation (Eq. (60)), and red solid lines represent power-law approximation (Eqs. (75) and (76) in Supplemental Text). Other parameters are set as the default values in Supplemental Table S[2](#SITable2).

**Supplemental Figure S6. Effects of model parameters and upstream and downstream scales on burst size and burst frequency on logarithmic scale**.

**(A-C)** Influences of model parameters (A), (B), (C) on burst size (top) and burst frequency (bottom). The circles are the theoretical prediction and the lines are the power-law approximations. **(D-F)** Influences of on burst size (top) and burst frequency (bottom). in (D) with fixed , . in (E) with fixed , . in (F) with fixed , . **(G-I)** Influences of different values of on and . The red solid lines represent the approximate linear relationship between and . Parameter values are set as , , in (G), , , in (H) and , , in (I). Other parameter values are the default values as in Supplemental Table S[2](#SITable2).

**Supplemental Figure S7. Effects of model parameters and upstream and downstream scales on ratio**  **in the**  **plane**.

**(A)** Mean slope ratio for (left), minimum slope ratio for (middle) and maximum slope ratio for (right) are obtained after the is calculated according to Eq. (77) in Supplemental Text. **(B)** A phase diagram illustrates the size boundaries of the slopes of burst size and burst frequency in the plane. The red lines are the separatrixes of data in (A). The blue dashed line is the separatrix in the case of enhancer deletion. Other parameter values are the default values in Supplemental Table S[2](#SITable2).

**Supplemental Figure S8. Influence of model parameters on mutual information.**

**(A-C)** Heatmap shows the joint effects of communication strength and minimum rate for fixed , in (A), for fixed , in (B), for fixed , in (C) on (top) and (bottom). The red line shows the values of corresponding to the maximum mutual information. **(D-F)** Heatmap shows the joint effects of genomic distance and minimum rate for fixed , in (D), for fixed , in (E), for fixed , in (F) on (top) and (bottom). Other parameter values are the same as the default settings in Supplemental Table S[2](#SITable2).
