# Supplementary material for: Power-law behavior of transcriptional bursting regulated by enhancer–promoter communication
Source: HighWire-hosted journal article supplement (doi:10.1101/gr.278631.123), 2024-01-01
Supplement: Supplemental_Tables.docx [file Supplemental_Tables.docx]

**Supplemental Table S1: Molecular processes of transcriptional bursting**

| **Gene state** | | **Reaction** | **Biological processes** |
| --- | --- | --- | --- |
| OFF | Deep inactive state () |  | Pioneer TFs binding ([1](#_ENREF_1)), **opening chromatin** ([2](#_ENREF_2)) |
| Primed burst state () |  | **TFs recruitment** ([3](#_ENREF_3)), the binding of activators on enhancer ([4](#_ENREF_4)), the distortion of TATA box ([5](#_ENREF_5)) and alteration of chromatin structure ([4](#_ENREF_4)). |
| ON | Pol II recruitment state () |  | TFs unbinding, disruption of TFs binding site |
|  | **Pol II recruitment** ([6](#_ENREF_6)), the formation of PIC ([7](#_ENREF_7)), promoter escape ([8](#_ENREF_8)) and Pol II pausing ([9](#_ENREF_9)). |
| Pol II pause release state () |  | TFs and Pol II unbinding from the target gene. |
|  | **Pol II pause release** ([10](#_ENREF_10)), productive elongation ([11](#_ENREF_11)), Pol II termination ([12](#_ENREF_12)) and another round of transcription ([6](#_ENREF_6)). |

**Supplemental Table S2: List of model parameter values**

| **Param** | **Description** | **Value** | **Ref** |
| --- | --- | --- | --- |
| Chromatin motion | | | |
|  | Time step |  | ([13](#_ENREF_13), [14](#_ENREF_14)) |
|  | Boltzmann constant |  | --- |
|  | Room temperature |  | --- |
|  | Monomer diffusion coefficient |  | ([15](#_ENREF_15)) |
|  | Friction coefficient |  |  |
|  | Spring constant between adjacent monomers |  | --- |
|  | E-P interaction coefficient | free | --- |
| Transcription | | | |
|  | Chromatin opening rate |  | ([16](#_ENREF_16)) |
|  | Chromatin closure rate |  | ([16](#_ENREF_16)) |
|  | Transcriptional initiation rate (from min to max) |  | ([17](#_ENREF_17)) |
|  | Pol II recruitment rate (from min to max) |  | ([18](#_ENREF_18)) |
|  | Pol II pause release rate (from min to max) |  | ([18](#_ENREF_18)) |
|  | Transcriptional termination rate (channel 1) |  | ([17](#_ENREF_17), [19](#_ENREF_19)) |
|  | Transcriptional termination rate (channel 2) |  | ([17](#_ENREF_17), [19](#_ENREF_19)) |
|  | Hill coefficient | 3 | ([20](#_ENREF_20)) |
|  | Half-value distance of burst rates |  | ([21](#_ENREF_21)) |
|  | E-P encounter distance (distance threshold) |  | ([22](#_ENREF_22)) |
|  | Transcriptional elongation rate |  | ([23-26](#_ENREF_23)) |
|  | Elongation length |  | ([27](#_ENREF_27)) |
|  | Transcriptional elongation time |  |  |
| Other parameters | | | |
|  | Nucleosome DNA length |  | ([28](#_ENREF_28)) |
|  | Genome length |  | ([29](#_ENREF_29)) |
|  | Number of monomers | 100 |  |

## References

1. K. S. Zaret, J. S. Carroll, Pioneer transcription factors: Establishing competence for gene expression. *Genes Dev.* **25**, 2227-2241 (2011).

2. Y. J. Li, X. H. Fu, D. P. Liu, C. C. Liang, Opening the chromatin for transcription. *Int. J. Biochem. Cell Biol.* **36**, 1411-1423 (2004).

3. D. Yusuf *et al.*, The transcription factor encyclopedia. *Genome Biol.* **13**, R24 (2012).

4. J. Soutourina, Transcription regulation by the Mediator complex. *Nat. Rev. Mol. Cell Biol.* **19**, 262-274 (2018).

5. B. Alberts *et al.*, *Molecular biology of the cell* (New York, Garland Science, 2014).

6. N. J. Fuda, M. B. Ardehali, J. T. Lis, Defining mechanisms that regulate RNA polymerase II transcription in vivo. *Nature* **461**, 186-192 (2009).

7. S. Schilbach *et al.*, Structures of transcription pre-initiation complex with TFIIH and Mediator. *Nature* **551**, 204-209 (2017).

8. A. Dvir, J. W. Conaway, R. C. Conaway, Mechanism of transcription initiation and promoter escape by RNA polymerase II. *Curr. Opin. Genet. Dev.* **11**, 209-214 (2001).

9. K. Adelman, J. T. Lis, Promoter-proximal pausing of RNA polymerase II: emerging roles in metazoans. *Nat. Rev. Genet.* **13**, 720-731 (2012).

10. F. X. Chen *et al.*, PAF1 regulation of promoter-proximal pause release via enhancer activation. *Science* **357**, 1294-1298 (2017).

11. Q. Zhou, T. Li, D. H. Price, RNA polymerase II elongation control. *Annu. Rev. Biochem.* **81**, 119-143 (2012).

12. J. N. Kuehner, E. L. Pearson, C. Moore, Unravelling the means to an end: RNA polymerase II transcription termination. *Nat. Rev. Mol. Cell Biol.* **12**, 283-294 (2011).

13. O. Shukron, D. Holcman, Transient chromatin properties revealed by polymer models and stochastic simulations constructed from Chromosomal Capture data. *PLoS Comput. Biol.* **13**, e1005469 (2017).

14. D. Jost, C. Vaillant, Epigenomics in 3D: Importance of long-range spreading and specific interactions in epigenomic maintenance. *Nucleic Acids Res.* **46**, 2252-2264 (2018).

15. M. R. Gartenberg, F. R. Neumann, T. Laroche, M. Blaszczyk, S. M. Gasser, Sir-mediated repression can occur independently of chromosomal and subnuclear contexts. *Cell* **119**, 955-967 (2004).

16. J. Rodriguez *et al.*, Intrinsic dynamics of a human gene reveal the basis of expression heterogeneity. *Cell* **176**, 213-226 (2019).

17. B. Zoller, S. C. Little, T. Gregor, Diverse spatial expression patterns emerge from unified kinetics of transcriptional bursting. *Cell* **175**, 835-847 (2018).

18. A. R. Krebs *et al.*, Genome-wide single-molecule footprinting reveals high RNA polymerase II turnover at paused promoters. *Mol. Cell* **67**, 411-422 (2017).

19. W. Shao, J. Zeitlinger, Paused RNA polymerase II inhibits new transcriptional initiation. *Nat. Genet.* **49**, 1045-1051 (2017).

20. S. Bottani, R. A. Veitia, Hill function‐based models of transcriptional switches: Impact of specific, nonspecific, functional and nonfunctional binding. *Biol. Rev.* **92**, 953-963 (2017).

21. H. Chen *et al.*, Dynamic interplay between enhancer–promoter topology and gene activity. *Nat. Genet.* **50**, 1296-1303 (2018).

22. D. I. Cattoni *et al.*, Single-cell absolute contact probability detection reveals chromosomes are organized by multiple low-frequency yet specific interactions. *Nat. Commun.* **8**, 1753 (2017).

23. T. O'Brien, J. T. Lis, Rapid changes in Drosophila transcription after an instantaneous heat shock. *Mol. Cell. Biol.* **13**, 3456-3463 (1993).

24. A. W. Shermoen, P. H. O'Farrell, Progression of the cell cycle through mitosis leads to abortion of nascent transcripts. *Cell* **67**, 303-310 (1991).

25. C. S. Thummel, K. C. Burtis, D. S. Hogness, Spatial and temporal patterns of E74 transcription during Drosophila development. *Cell* **61**, 101-111 (1990).

26. J. Yao, M. B. Ardehali, C. J. Fecko, W. W. Webb, J. T. Lis, Intranuclear distribution and local dynamics of RNA polymerase II during transcription activation. *Mol. Cell* **28**, 978-990 (2007).

27. M. D. Adams *et al.*, The genome sequence of Drosophila melanogaster. *Science* **287**, 2185-2195 (2000).

28. T. J. Richmond, C. A. Davey, The structure of DNA in the nucleosome core. *Nature* **423**, 145-150 (2003).

29. E. Z. Kvon *et al.*, Genome-scale functional characterization of Drosophila developmental enhancers in vivo. *Nature* **512**, 91-95 (2014).
