# Supplementary material for: Power-law behavior of transcriptional bursting regulated by enhancer–promoter communication
Source: HighWire-hosted journal article supplement (doi:10.1101/gr.278631.123), 2024-01-01
Supplement: Supplemental_Text.docx [file Supplemental_Text.docx]

**Supplemental Text**

**Power-law behavior** of **transcriptional bursting regulated by enhancer-promoter communication**

Zihao Wang, Zhenquan Zhang, Songhao Luo, Tianshou Zhou, and Jiajun Zhang

[A Multiscale model of transcriptional bursting 2](#_Toc153093777)

[A1 Stochastic model of upstream chromatin motion 2](#_Toc153093778)

[A2 Multi-state model of downstream transcriptional bursting 3](#_Toc153093779)

[A3 Information flow from chromatin conformation to transcriptional bursting 5](#_Toc153093780)

[B Theoretical analysis of transcriptional bursting 6](#_Toc153093781)

[B1 Analytical results for upstream chromatin dynamics 6](#_Toc153093782)

[B2 Analytical results for downstream bursting kinetics 8](#_Toc153093783)

[C Power laws for transcriptional bursting kinetics 13](#_Toc153093784)

[C1 Binary approximation 13](#_Toc153093785)

[C2 Power laws for transcriptional bursting kinetics 15](#_Toc153093786)

[D E-P communication mainly modulates burst frequency 17](#_Toc153093787)

[E Explanation of mutual information 17](#_Toc153093788)

[F Biologically reasonable setting of model parameter values 18](#_Toc153093789)

[References 21](#_Toc153093790)

## Multiscale model of transcriptional bursting

### Stochastic model of upstream chromatin motion

We model chromatin as a folded polymer chain, a collection of monomers connected by springs. We assume that a monomer represents a nucleosome, and a nucleosome represents an enhancer whereas another nucleosome represents a promoter. An enhancer can transmit its regulatory information to its cognate promchoters. This communication depends on the inherent characteristics of regulatory elements (such as enhancers) and the surrounding microenvironment (transcription factors, complexes, etc.). From a physical viewpoint, we can coarse-model the interactions between biomolecules involved in E-P communication as a force (or the potential). Also, we posit that there are only one enhancer and one promoter on the chromatin (i.e., polymer) although multiple enhancers may exist, and neglect attraction or repulsion between other monomers in the chain except for the communication between the enhancer and the promoter. Then, the chromatin motion can be described by the Langevin equation

where is the total potential of the polymer chain at time . We make decomposition , where is the potential of the successive monomers and is that of the E-P communication.

To simplify but without loss of generality, harmonic springs with stiffness are used between the monomers of nearest-neighbors along the chain. Thus, the potential of the successive monomers is

where is the position of the bead in space and is the mean distance between neighboring monomers. E-P communication can be modeled using harmonic potential or Lennard-Jones (LJ) potential. It should be pointed out that no matter which type of potential is used, it is necessary to introduce a quantity characterizing E-P communication strength, which is defined as the ratio of the force generated by the biomolecule’s interaction per unit of E-P spatial distance. Here, the E-P communication is characterized by the harmonic spring, and the corresponding potential is assumed to take the form

where is the spring coefficient between the enhancer and the promoter (also called communication strength), and represent the enhancer and the promoter with . we introduced is a physical quantity that cannot be measured directly by experiments, but it essentially reflects the E-P contact frequency or probability, which can be estimated from conformational data such as Hi-C data. Let represents the E-P genomic distance.

For analysis simplicity but without loss of generality, we set in Eq. and . Since all the interactions we consider in the main text are represented by harmonic potentials, Eq. can be rewritten as

where and are matrixes showing the connectivity between adjacent beads and the E-P interaction, given by

Eq. with Eq. characterize the movement of chromatin.

We point out that, communication strength depends, in general, on the inherent property of regulatory elements and the microenvironment around them.

### Multi-state model of downstream transcriptional bursting

The ON-OFF model provides a simple quantitative analysis framework to explain transcriptional burst, but transcription bursting is a complex biochemical process. Some gene-expression processes, e.g., those involving complex promoter (or E-P) dynamics, TFs and cofactors (COFs) dynamics and Pol II dynamics, would not be described by simple two-state models. Recent studies have extended two-state models to multistate models. In our main text, we used a four-state model to simulate transcriptional bursting dynamics with biological details stated below for better understanding (Supplemental Table S2).

**Figure ST1.** Kinetic scheme for a four-state model of transcriptional bursting.

***OFF states*** - In the case that chromatin is silent, the mechanism of how a suitable transcriptional state for DNA transcription is created is unclear, but constantly increasing data have shown that the non-permissive period follows a non-exponential distribution ([3](#_ENREF_3), [4](#_ENREF_4)), indicating that the process from non-permissive to permissive transcription states is memorial, and is more complex rather than a single-step Markov process that is memoryless. This memory implies that a single OFF state in the traditional telegraph model is not enough to characterize the non-permissive state of chromatin. In addition, chromatin remodeling and nucleosome unwrapping due to the accessibility of chromatin are necessary for gene transcription. Pioneer TFs have unique properties that can open closed chromatin ([5](#_ENREF_5)) to expose the promoter motif. Subsequently, the promoter, which is in a state of primed burst, employs general TFs, Mediator and Pol II for transcription. For this purpose, a deep inactive state (, closed chromatin) and a primed burst state () are considered as the OFF state (, non-permissive period).

***ON states*** - Besides the non-permissive period (inactive state ), two most important processes in the transcription cycle are Pol II recruitment to the promoter and Pol II pause release from promoter-proximal ([6](#_ENREF_6), [7](#_ENREF_7)). Pol II is necessary for transcribing DNA into mRNA and paused Pol II is a common step in gene transcription and regulation ([8](#_ENREF_8), [9](#_ENREF_9)). Recent studies have indicated that paused Pol II is more stable than Pol II in the PIC stage ([10](#_ENREF_10), [11](#_ENREF_11)), and promoters with Pol II are more sensitive in response to stresses than those lacking Pol II ([12](#_ENREF_12)). Meanwhile, paused Pol II can prevent new Pol II initiation to reduce transcriptional noise ([10](#_ENREF_10)). After the release of paused Pol II, the next Pol II recruitment can be carried out. Since Pol II recruitment occurs after burst initiation ([13](#_ENREF_13)), we employ Pol II recruitment state () and Pol II pause release state () as state ON (, permissive period) in the bursting stage. These two states, and , can be switched to each other. And we assume that the process from back to generates an mRNA.

The bursting system to be studied is described by a set of biochemical reactions on a slow timescale in contrast to the introduced-above system of chromatin motion on a fast timescale (Figure ST1). Note that rates , are effective rates that summarize a series of sub-processes. Since burst termination is relatively dynamic ([14](#_ENREF_14)), we hypothesize that both and states can return to . Also, because is a deep inactive state, it is unlikely for and states to return directly to state in one step. Thus, we posit that only can be switched to .

Based on the above description, the state transition matrix is expressed as

where all the type parameters are dependent on the E-P spatial distance and will be discussed at later.

In addition, we point out that strictly speaking, the reaction is not correct since this reaction’s output is nascent mRNA () rather than mature mRNA (). Therefore, in reality the model should be followed by . The lifetime of nascent mRNA is not exponential but rather closer to deterministic and that is because it is determined by the elongation time plus the termination time. Hence, the time between successive nascent mRNA production events is exactly the same as the time between successive mature mRNA production events ([15](#_ENREF_15)). This justifies the use of .

Note that although our model is a multi-state one, it is different from multi-state models in previous studies ([16](#_ENREF_16), [17](#_ENREF_17)). Previous models assumed that gene state does not change when mRNA is produced (i.e., ), implying that the detailed processes of transcriptional bursting are ignored. In contrast, our model assumes, based on biological phenomena, that mRNA is produced in the process of switching from one state to another (i.e., ). This is crucial for capturing the feature that only one Pol II is permitted to bind to promoter and the second Pol II recruitment must occur after the first Pol II pause release. Also, our model can capture some characteristics (such as traveling ratio, the effect of altering Pol II pause release rate) that cannot be obtained by the previous models.

### Information flow from chromatin conformation to transcriptional bursting

E-P communication, which plays a vital role in regulating stochastic gene expression, should be taken into account in transcriptional bursting. First, transcription activators binding to enhancers recruit TFs to alter chromatin structure and make it more accessible to active transcription ([18](#_ENREF_18)). Second, E-P interaction co-regulates the recruitment of TFs and Pol II and the assembly of PIC ([19](#_ENREF_19), [20](#_ENREF_20)). Besides, enhancers recruit Mediator complex or histone acetyltransferase p300 to help the Pol II on promoters initiate transcription ([21](#_ENREF_21)). Third, enhancers promote dissociation of NELF by recruiting COFs to affect Pol II pause-release on promoter-proximity ([22](#_ENREF_22)). Correspondingly, gene state transition rates of the biochemical reactions govern transcriptional bursting. According to the above experimental observations or evidences, we assume that the state transition rates are related to the E-P spatial distance denoted by . However, biological experiments did not tell us how these rates quantitatively depend on . In fact, this dependence relationship would be complex and in particular, it would be organism-specific. To simplify our analysis, we will, by making assumptions, set a special but common form of to link the downstream transcription to the upstream chromatin configuration.

Note that the opening chromatin (from to ) would be mainly associated with pioneer TFs. Thus, we assume is a constant independent of E-P spatial distance. Additionally, since the relationship between the , and E-P distance may be opposite to that between , and the distance, we set rates , and as constants for simplicity.

First, chromatin structure generally does not act as a binary switch but acts as a modulator of gene function (non-binary) ([23](#_ENREF_23)). Second, cooperative and synergistic binding to DNA is a common way in organisms. For example, in transcription processes, the binding of TFs may affect the binding rate of other TFs, Mediators or Pol II. Thus, it seems more reasonable to assume that the E-P spatial distance affects transcriptional burst rates in a nonlinear manner. Here we use Hill functions, which are very successful in modeling biological phenomena ([24](#_ENREF_24)), to describe the transcription rates. To sum up, we assume that rate-vector is a Hill-like function vector of , i.e. . The piecewise continuous nonlinear rate function , depending on the E-P spatial distance is

where and are the minimum (basic) and maximum reaction rates for reactions , is the spatial distance when is equal to , is a Hill coefficient that controls how steep the rate curve is, and is a distance threshold. When the E-P distance is less than , the is also used to describe the encounter of E-P. Therefore, it is reasonable to assume that the state transition rates are maximum when the distance is less than in Eq. . Besides, encounter, which is merely an assumption in physical statistics, does not mean direct contact. As the distance increases, state transition rates can reduce to the minimum. Eq. can illustrate how the transition rates vary with E-P topologies, and further indicate that transcription is regulated at any time.

In our numerical simulation and theoretical analysis, we sufficiently use the relationship described by Eq. . However, it is needed to point out that parameters , may take other forms except for form . In general, may be set nonlinear decreasing functions of . Also, can be set increasing functions to explain the special case that the enhancer activation of increasing E-P spatial distance ([25](#_ENREF_25)). Finally, , may take a form of functions that are not constants.

## Theoretical analysis of transcriptional bursting

### Analytical results for upstream chromatin dynamics

In this subsection, we derive the expression of the E-P spatial distance distribution. Term in Eq. is a singular matrix. To eliminate the degrees of freedom, the position of the first monomer in the chain can be set as based on the methods in ([26](#_ENREF_26)). Thus, the Fokker-Planck equation corresponding to Eq. can be rewritten as

where , and

where .

Owing to the fact that every monomer moves independently in each dimension, the PDF for chromatin conformation can be expressed as

In fact, the monomer motion in Eq. is an Ornstein-Uhlenbeck process and the general solution to this equation is a Gaussian distribution. If we consider one-dimensional PDF , the can be analytically expressed as ([27](#_ENREF_27))

where is a normalization constant and

The is a multivariate normal distribution with the zero mean and the covariance matrix being . The marginal distributions for the enhancer and promoter are calculated according to

Based on the properties of Gaussian distribution, the marginal PDFs in Eq. are also Gaussian distributions.

By calculating, we find that the analytical expression of the PDF of the E-P spatial distance takes the form

where

In Eq. , is the E-P genomic distance, i.e., , which is different from the E-P spatial distance . Note that Eq. is a Maxwell-Boltzmann (MB) distribution (referring to Figure S1A), which can be regarded as the positive square root of the sum of squares of three independent random variables with each following the same normal distribution. Equivalently, each normal distribution represents the E-P distance in a certain dimension. Thus, Eq. is the distribution of the E-P Euclidean distance in 3D. More precisely, Eq. is equivalent to the chi distribution with three degrees of freedom and a scale parameter .

Except for the harmonic spring between the enhancer and the promoter in Eq. , which accounts for the E-P communication, the enhancer and the promoter are also connected in series by springs with the same elastic coefficient . These connected springs are in effect equivalent to a spring with an elastic coefficient . Thus, the connection between the enhancer and the promoter can be viewed as two paralleling springs, which are further equivalent to a spring with an elastic coefficient . Due to the Einstein relation , the distribution is determined by the temperature (or the product of and , rather than or alone) and the equivalent spring. Furthermore, the scale parameter in Eq. measures the spatial distance in units proportional to the square root of the ratio of temperature and spring coefficient .

Finally, we would like to point out: (1) the statement that is the E-P genomic distance is not accurate, but is actually the number of monomers between the enhancer and the promoter in simulation. If one monomer is assumed to be a nucleosome, the E-P genomic distance should be expressed as , where is the DNA length around the nucleosome; (2) the total genomic length is independent of the E-P spatial distance distribution . In numerical simulations, the number of simulated monomers is thus unimportant compared with that of monomers between the enhancer and the promoter, i.e., ; (3) the form of modified LJ potential between the enhancer and the promoter provides a strategy that replaces the linear harmonic spring. Although the LJ potential is more difficult to analyze, numerical simulations find that LJ potential can be also fitted with MB distribution (referring to Figure S1F). Therefore, the harmonic bond does not lose the essence of E-P communication but may bring conveniences for theoretical analysis combined with experimental data. (4) the probability of enhancer meeting promoter decreases monotonically with the increase of , which seems contrast to the conclusion that E-P encounter frequency depends non-monotonically (first increasing and then decreasing) on ([28](#_ENREF_28), [29](#_ENREF_29)). However, the increasing trend occurs when the E-P genomic distance is very small (e.g., the distance between two nucleosomes is about 500bp). In our model, what we consider is that on a larger scale of genomic distance, the probability is monotonically decreasing with increasing . (5) The MB distribution was originally introduced in polymer theory, which held for the end-to-end distance of an ideal Rouse chain. However, our model is a generalized Rouse model with a pair of long-range E-P interaction and considers the E-P distance rather than the end-to-end distance. This means that the MB distribution of E-P spatial distance cannot be taken as a simple corollary. The characteristic parameters of the MB distributions have different meanings in different situations, though the distance distributions are still MB distributions.

### Analytical results for downstream bursting kinetics

In this subsection, we only consider the downstream transcriptional bursting. The PDF or PMF obtained in this subsection is actually the cPDF given the E-P spatial distance .

Burst size is unrelated to the state since only when the gene is activated () can mRNA be produced. Besides, the residence time of the state can be calculated independently from other states due to the particularity of . Thus, we first focus on the burst stage (i.e., ) and ignore the state in the following derivation. Let the initial time of burst stage () be set at the moment when the state switches to the state .

Let be the survival probability that mRNAs are produced during a burst (i.e., ) in the state (i.e., ) at the time (i.e., ). Then,

where is the exit time from the state . Hereafter we define . Note that the expressions of the state in formulas and of the state , in the main text may be different but their meanings are the same. In the following, we rewrite the survival probability as for the sake of simplicity and beauty of the formulas.

Based on Eq. , we consider an infinitesimal interval . Then, can be expressed as

The master equations determining the probabilities from Eq. are

This equation group is valid for all .

To solve Eq. , we introduce the generating function for

Then, we have the following partial differential equations

Eliminating from Eq. , we obtain the following second-order differential equation

This equation can be viewed as an ordinary differential equation with constant coefficients. The corresponding characteristic equation is

Solving this algebraic equation yields

and we can show . Thus, a general solution to Eq. is

where and are constants determined by initial conditions. Substituting Eq. into the second equation of Eq. , we have

Note that is the initial state of a burst. If taking , and (, ) as the initial conditions, we have the following algebraic equation group determining two constants and

Solving Eq. gives

Substituting Eq. into Eq. and , we know that the solution of Eq. is

To that end, we have obtained the solution of the generating function corresponding to the survival probability.

**1. Burst size**

In our four-state model, both and can return to so that the burst ends. And the transitions between and can be carried out many times before one burst ends, resulting in the bursty production of mRNAs.

**Figure ST2**. Schematic for the transitions between discrete states and the generation of mRNAs. , and are three states in the model. is the number of mRNAs. are burst rates. The star in the left top corner is the initial state of a burst.

The probability that burst termination time falls within an infinitesimal interval equals

The joint probability density for (discrete random variable) and burst termination time (continuous random variable) include all incoming fluxes driving the system from state and to state (or ) (Figure ST2). That is,

Then, the marginal probability distribution for is calculated according to

Denote by the generating function for . Then based on Eq. and Eq. , we can obtain

On the other hand, can be expanded as . Therefore, by identifying the coefficients of the same powers of , we can see that burst size follows the following geometric distribution (referring to Supplemental Figure S2B)

where

Furthermore, Eq. can be rewritten as

In our model, there are two termination channels whose probability fluxes are expressed perfectly in Eq. . The first term on the right-hand side shows the probability from the state directly back to the burst termination state so that the burst ends. And the second term reflects that the probability flux is first from the state to state and then burst terminates at state . Therefore, is the success probability of burst termination. Besides, can be expressed as

which shows the probability flux from state to state first and then back to the state , implying a new mRNA is generated. Thus, is the failure probability of burst termination. And the MBS is given by

**2. Dwell time, cycle time and burst frequency**

Next, we derive analytical expressions for dwell time and cycle time. First, we calculate the dwell time in each state. Note that the cycle time is equal to the sum of dwell time in all the states.

Following the above analysis, we first neglect the dwell time in state and then compute the dwell time in state . Subsequently, the dwell time in the state can be calculated separately (Figure ST3).

**Figure ST3**. Schematic for the transition between discrete states. The notations have the same meaning as in Figure S[T2](#SIFig6).

Based on the discussion of burst size in the previous subsection, the marginal survival probability for time in Eq. is

where is the exit time from state . For simplicity, we denote as .

By using Eq. and , and by setting , we have

Thus, the survival probability functions at and states equal

where

According to the relationship between PDF and survival probability and using Eq. , the dwell time PDFs and are

Since Eq. is the solution of Eq. , the PDF of the total ON state dwell time, (note: the complete expression is ) is given by (referring to Supplemental Figure S2D)

where

The mean ON dwell time (note: the complete expression is ) can be obtained and the result is

Next, we compute the PDF of dwell time in state. Owing to the introduction of , the is a state of the flux that the probability only flows out but does not flow in. By using the same method (the derivation process is omitted here), the dwell time PDF and are found to be

where

The total OFF state dwell time PDF (note: the complete expression is ) is given by (referring to Supplemental Figure S2E)

where

The mean OFF state dwell time (note: the complete expression is ) is

Note that the PDF of cycle time is the convolution of in Eq. and in Eq. . As such, the equals (referring to Supplemental Figure S2C)

where , , and are shown in Eq. , , and . By complex calculation, the MCT is given by

Finally, the BF is given by

Note that the BF in Eq. is measured in , meaning how many transcriptional bursts occur in one second.

## Power laws for transcriptional bursting kinetics

### Binary approximation

In the previous section, some rates related to E-P spatial distance are described by a piecewise continuous non-binary Hill function in Eq. . The power of Hill function brings difficulties to the theoretical calculations of MBS, MDT, MCT, and MTR. For this reason, we consider using a simple function to approximate the Hill function. At the simplest level, we may use a deterministic binary rate for transcriptional burst for approximation. That is,

Note that we choose instead of in Eq. as the threshold.

For binary linearization, only the maximum rate and the minimum rate are needed. For requirement, we compute (referring to Supplemental Figure S1C), which is the CDF of that can be expressed as

where is the error function defined as . The Eq. establish a direct relationship between E-P communication strength and experimental contact probability data.

In the case that fluctuations in are much faster compared with the rate of transcription, may be approximated as

Then, and can be approximated as and , and

On contrary, if fluctuations in are much slower, the and can be approximated as and , and

where

Therefore, the approximations of and can be expressed as (referring to Supplemental Figures S5D-E and I-J)

### Power laws for transcriptional bursting kinetics

E-P communication strength and E-P genomic distance are two key parameters in our model. Note that in Eq. can be regarded as a function of three independent variables , and , and may be written as . Therefore, MBS and MCT can be also treated as multivariate functions, denoted by and , respectively. In order to show the effects of increasing or on and , we calculate derivatives: and , and .

Using Eq. , we know that

and

In the following, for the sake of simplicity, we rewrite as () when analyzing the effect of (). Note that the following theoretical derivation is for the case of (when we consider ) and (when we consider ). Of course, the corresponding theoretical derivation method is still applicable to cases of other parameter values.

1. **Power law in terms of E-P communication strength**

The effect of changing on MBS can be approximated as

where

and .

Similarly, the effect of changing on BF is

where

and .

Note that both and are positive when the parameters are not extreme. They increase for small and then quickly decrease to 0 with increasing . Meanwhile, the value of the derivatives changes little (the maximum values are not more than 0.8, Supplemental Figures S5A-C), implying that linear approximation is appropriate for and within an appropriate range of .

Assume that we can obtain distribution when is greater than a pre-given value, and where (Supplemental Figure S1D). We define

which represents the slope of the line of vs . Then, we obtain the following an approximate linear relation:

which implies that mean burst size obeys the following power law:

Similarly, burst frequency obeys the following power law:

1. **Power law in terms of E-P genomic distance**

Similarly, we can also compute and , that is,

where

and .

Based on Eq. , we know that the monotonicity of and is opposite that of and , respectively. Moreover, and decrease for small and then quickly increase to 0 with increasing . Meanwhile, the derivatives value changes little (the minimum values are not less than -0.6, Supplemental Figures S5F-G), implying that linear approximation is appropriate for and within an appropriate range of .

Assume that we can obtain distribution where is the minimum of and (Supplemental Figure S1D). Numerical results indicate that the turning point for the biphasic responses of burst size and burst frequency to is different. We denote by and the values corresponding to the turning points of burst size and burst frequency respectively. And we define

which represents the slope of the line of vs . Then, we obtain the following approximate linear relation when

which implies that mean burst size obeys the following power law:

For , burst frequency obeys the following power law:

Numerical simulations including analysis of experimental data have verified these power-law behaviors, referring to Supplemental Figure S6.

## E-P communication mainly modulates burst frequency

In order to theoretically investigate which of burst size and burst frequency is more affected than the other by E-P communication, we consider the ratio

Note that for enhancer deletion, we have . In this case, the transcriptional burst rates are always the minimums and are independent of E-P spatial distance . Then, Eq. can be written as

In the main text, we have mapped the high-dimensional parameter space into an experimentally measurable and theoretically computable two-dimensional space. The key is that we take ratios and as the coordinates in two-dimensional space, where the involved are defined in Eq. .

## Explanation of mutual information

We find the value is in general small. This may be because of the following three reasons. First, our model only considers one E-P pair, but in the real organisms, multiple pairs can be formed. And multiple genes or multipair E-P communication generally transduce more information than a single E-P communication ([30](#_ENREF_30)). Second, multiple output distributions such as burst size distribution and cycle time distribution make it possible to separately measure the amount of the information transduced from the E-P communication signal to outcome distributions. This would lead to smaller than calculating the mutual information between the input distribution and the gene expression distribution that integrates BS’s and CT’s information. The third possible reason is that the timescale difference between the upstream and the downstream influences the size of mutual information, e.g., if the upstream motion is much faster than the downstream but the information arriving at the downstream is the average, the upstream and the downstream are independent and the mutual information between them is zero. However, the smaller mutual information does not mean that E-P communication is meaningless but may reflect the robustness of E-P communication.

## Biologically reasonable setting of model parameter values

*Drosophila*, one of the intensively studied organisms in the biological field, serves as a test system to explore cellular processes including transcriptional bursting. To investigate the power of our model, it is needed to discuss how the model parameters to fit experimental conditions.

**1. Enhancer and promoter lengths**

Enhancers and promoters are regulatory elements in transcriptional activation and bursting, and their lengths are highly variable in different organisms or genes.

The length of an enhancer can vary from about 50 bp to 1.5 kbp ([31](#_ENREF_31)) and typically, the metazoan enhancer is ~500 bp ([32](#_ENREF_32)). For example, in *Drosophila* embryo, the *rhomboid* (*rho*) enhancer is 300 bp in length, the *brinker* (*brk*) and *vein* (*vn*) enhancers are 500 bp in length ([32](#_ENREF_32)) and the enhancer of *lab* gene contains a 550 bp fragment ([33](#_ENREF_33)). Each enhancer contains specific motifs and multiple binding sites for TFs, and these motifs assemble within a ~300 bp core domain ([32](#_ENREF_32)). Therefore, we stipulate that the enhancer length is 300 bp in simulations.

Promoters can be divided into peaked and broad promoters based on their widths. And promoter length is also highly variable. In *Drosophila*, the median width of broad promoters is 162 bp ([34](#_ENREF_34)). An experimental program obtained 422 kbp promoter sequences from 2424 genes in *Drosophila* ([35](#_ENREF_35)), and then we can calculate that one promoter is about 174 bp in length. Thus, we assume the promoter length is 170 bp in simulations.

The length of DNA around a nucleosome is about 167 bp, which is approximate to that of a promoter. In contrast, the length of the linker DNA is more variable, ranging from 10 bp to 90 bp ([36](#_ENREF_36), [37](#_ENREF_37)). Thus, the length of DNA in one nucleosome plus the length of the linker DNA at both sides of the nucleosome is approximately equal to that of the enhancer. Overall, we can use one nucleosome indicates an enhancer or a promoter.

**2. E-P genomic distance and the number of monomers**

Along the linear genome, the distances between the enhancers and their cognate promoters vary greatly. In *Drosophila*, this distance can be more than 100 kbp. The median distance is 10 kbp and the most possible distance of an E-P pair is 5 kbp ([38](#_ENREF_38)). The distances from more than 70% of enhancers to target transcriptional start sites do not exceed 20 kbp. Therefore, we set the total genome length as 20 kbp in simulations. And the E-P genomic distance is set to be 10 kbp by default. When considering the effect of E-P genomic distance on transcriptional bursting, we let the E-P genomic distance increase from 1 kbp to 20 kbp. In simulations, we assume that one monomer represents a nucleosome (~200 bp). Thus, the number of monomers is 100.

**3. Monomer diffusion coefficient**

The Boltzmann constant equals and we set temperature as (room temperature). Thus, . Owing to the Einstein relation and the fact that the E-P spatial distance PDF is affected by the product of and , we may not care about the respective values of and . We set the monomer diffusion coefficient of DNA as and thus the friction coefficient is. Of course, for and , we can set different values, but must be guaranteed. It is worth noting that the size of affects the timescale of upstream chromatin motion.

**4. Spring coefficient for successive monomers and E-P communication strength**

We set the spring coefficient for successive monomers is . In *Drosophila* embryos ([39](#_ENREF_39)), the difference between the E-P distances of different experiments can reach up to . The E-P interaction coefficient may change in the range of , so we can study the effects of distinct on bursting kinetics. Note that means that there is no communication between enhancer and promoter. Also, it is unnecessary to consider the case of larger () because the bursting dynamics do not change with the increase when . The is set to be by default.

**5. Hill function**

The Hill coefficient measures ultra-sensitivity. In biology, the usually changes from 2 to 5 ([40](#_ENREF_40), [41](#_ENREF_41)). We fix for the studies in the main text. The increase of makes the Hill function closer to the binary function, which leads to the better approximation effect (Figure S[9](#SIFig9)). The E-P encounter distance is and approximately equals to in ([42](#_ENREF_42)).

E-P communication or E-P proximity is necessary for transcriptional bursting. The E-P distance is about in bursting ([39](#_ENREF_39), [43-45](#_ENREF_43)). When E-P spatial distance is larger than , the burst rates tend to the minimum. Considering this, we assume the half-value distance of burst rates is , and thus the rates drop to the minimum around .

**6. Gene states switching rates**

In *Drosophila*, the burst duration is about 10-20 minutes ([46-49](#_ENREF_46)). The sm-FISH has shown that in *Drosophila* gap genes, the mRNA is transcribed with the average residence time and the gene is not expressed with a relatively longer lifetime.

In Section [C](#_Theoretical_analysis_of), we analytically showed that the OFF-state dwell time is . For simplicity, we assume that the relationship between and is multiple ([17](#_ENREF_17)), e.g., . Thus, the OFF-state dwell time is . We can assume that the fluctuating range of the transcriptional initial rate is from to . Due to the deep inactive state , the transition rates between and are smaller than those between and . We set and .

If we set , the ON-state dwell time can be theoretically reduced to . We set the value of as . Because the paused Pol II is more stable ([10](#_ENREF_10), [11](#_ENREF_11)), we suppose and set , .

The promoter-proximal pausing timescale is about a minute level ([50](#_ENREF_50)). We assume that the fluctuating range of the Pol II pause release rate is from to . In addition, we assume that the fluctuating range of the Pol II recruitment rate is from to

**7. Transcriptional elongation**

DNAs are transcribed at a speed of about ([51](#_ENREF_51)). Many methods have measured that in *Drosophila*, the elongation rate is , i.e., ([52-55](#_ENREF_52)). In addition, recent studies have suggested that in the *Drosophila* embryo, the Pol II elongation rate is ([56](#_ENREF_56)), approximately twice as the previously estimated value. These facts indicate that the rate of elongation is variable in different developmental stages. For simplicity, we consider that the Pol II elongation rate is about .

In *Drosophila*, the size of the averagely predicted mRNA transcripts is 3058 bp ([57](#_ENREF_57)). We let the gene body’s length be roughly 3000 bp. Therefore, the transcriptional elongation time is about . Note that the here is different from genome length . is the length of the gene to be transcribed after the pause release of the Pol II, which is independent of in simulations.

## References

1. O. Shukron, D. Holcman, Transient chromatin properties revealed by polymer models and stochastic simulations constructed from Chromosomal Capture data. *PLoS Comput. Biol.* **13**, e1005469 (2017).

2. D. Jost, P. Carrivain, G. Cavalli, C. Vaillant, Modeling epigenome folding: formation and dynamics of topologically associated chromatin domains. *Nucleic Acids Res.* **42**, 9553-9561 (2014).

3. C. V. Harper *et al.*, Dynamic analysis of stochastic transcription cycles. *PLoS Biol.* **9**, e1000607 (2011).

4. D. M. Suter *et al.*, Mammalian genes are transcribed with widely different bursting kinetics. *Science* **332**, 472-474 (2011).

5. A. Mayran *et al.*, Pioneer and nonpioneer factor cooperation drives lineage specific chromatin opening. *Nat. Commun.* **10**, 3807 (2019).

6. J. T. Lis, A 50 year history of technologies that drove discovery in eukaryotic transcription regulation. *Nat. Struct. Mol. Biol.* **26**, 777-782 (2019).

7. N. J. Fuda, M. B. Ardehali, J. T. Lis, Defining mechanisms that regulate RNA polymerase II transcription in vivo. *Nature* **461**, 186-192 (2009).

8. S. Nechaev *et al.*, Global analysis of short RNAs reveals widespread promoter-proximal stalling and arrest of Pol II in Drosophila. *Science* **327**, 335-338 (2010).

9. L. J. Core, J. J. Waterfall, J. T. Lis, Nascent RNA sequencing reveals widespread pausing and divergent initiation at human promoters. *Science* **322**, 1845-1848 (2008).

10. W. Shao, J. Zeitlinger, Paused RNA polymerase II inhibits new transcriptional initiation. *Nat. Genet.* **49**, 1045-1051 (2017).

11. T. Henriques *et al.*, Stable pausing by RNA polymerase II provides an opportunity to target and integrate regulatory signals. *Mol. Cell* **52**, 517-528 (2013).

12. R. C. Wilkins, J. T. Lis, Dynamics of potentiation and activation: GAGA factor and its role in heat shock gene regulation. *Nucleic Acids Res.* **25**, 3963-3968 (1997).

13. C. R. Bartman *et al.*, Transcriptional burst initiation and polymerase pause release are key control points of transcriptional regulation. *Mol. Cell* **73**, 519-532 (2019).

14. J. N. Kuehner, E. L. Pearson, C. Moore, Unravelling the means to an end: RNA polymerase II transcription termination. *Nat. Rev. Mol. Cell Biol.* **12**, 283-294 (2011).

15. S. Braichenko, J. Holehouse, R. Grima, Distinguishing between models of mammalian gene expression: telegraph-like models versus mechanistic models. *Journal of the Royal Society Interface* **18**, 20210510 (2021).

16. T. Zhou, J. Zhang, Analytical results for a multi-state gene model. *SIAM J. Appl. Math.* **72**, 789-818 (2012).

17. J. Rodriguez *et al.*, Intrinsic dynamics of a human gene reveal the basis of expression heterogeneity. *Cell* **176**, 213-226 (2019).

18. J. Soutourina, Transcription regulation by the Mediator complex. *Nat. Rev. Mol. Cell Biol.* **19**, 262-274 (2018).

19. S. Sainsbury, C. Bernecky, P. Cramer, Structural basis of transcription initiation by RNA polymerase II. *Nat. Rev. Mol. Cell Biol.* **16**, 129-143 (2015).

20. H. Szutorisz, N. Dillon, L. Tora, The role of enhancers as centres for general transcription factor recruitment. *Trends Biochem. Sci.* **30**, 593-599 (2005).

21. V. Haberle, A. Stark, Eukaryotic core promoters and the functional basis of transcription initiation. *Nat. Rev. Mol. Cell Biol.* **19**, 621-637 (2018).

22. Y. Aoi *et al.*, NELF regulates a promoter-proximal step distinct from RNA Pol II pause-release. *Mol. Cell* **78**, 261-274 (2020).

23. T. Misteli, The self-organizing genome: Principles of genome architecture and function. *Cell* **183**, 28-45 (2020).

24. S. Goutelle *et al.*, The Hill equation: A review of its capabilities in pharmacological modelling. *Fundam. Clin. Pharmacol.* **22**, 633-648 (2008).

25. N. S. Benabdallah *et al.*, Decreased enhancer-promoter proximity accompanying enhancer activation. *Mol. Cell* **76**, 473-484 (2019).

26. M. Bohn, D. W. Heermann, R. Van Driel, Random loop model for long polymers. *Phys. Rev. E* **76**, 051805 (2007).

27. C. W. Gardiner, *Handbook of stochastic methods for physics, chemistry and the natural sciences* (Springer, 2004).

28. K. Rippe, P. Hippel, J. Langowski, Action at a distance: DNA-looping and initiation of transcription. *Trends Biochem. Sci.* **20**, 500 (1995).

29. Ringrose, L., Quantitative comparison of DNA looping in vitro and in vivo: chromatin increases effective DNA flexibility at short distances. *EMBO J.* **18**, 6630-6641 (1999).

30. A. S. Hansen, E. K. O'Shea, Limits on information transduction through amplitude and frequency regulation of transcription factor activity. *eLife* **4**, e06559 (2015).

31. E. M. Blackwood, J. T. Kadonaga, Going the distance: A current view of enhancer action. *Science* **281**, 60-63 (1998).

32. A. Erives, M. Levine, Coordinate enhancers share common organizational features in the Drosophila genome. *Proc. Natl. Acad. Sci. U.S.A.* **101**, 3851-3856 (2004).

33. N. C. Grieder, T. Marty, H.-D. Ryoo, R. S. Mann, M. Affolter, Synergistic activation of a Drosophila enhancer by HOM/EXD and DPP signaling. *EMBO J.* **16**, 7402-7410 (1997).

34. R. A. Hoskins *et al.*, Genome-wide analysis of promoter architecture in Drosophila melanogaster. *Genome Res.* **21**, 182-192 (2011).

35. T. A. Down, C. M. Bergman, J. Su, T. J. P. Hubbard, Large-scale discovery of promoter motifs in Drosophila melanogaster. *PLoS Comput. Biol.* **3**, e7 (2007).

36. H. Lodish *et al.*, *Molecular cell biology* (Macmillan Learning, 2000).

37. T. J. Richmond, C. A. Davey, The structure of DNA in the nucleosome core. *Nature* **423**, 145-150 (2003).

38. E. Z. Kvon *et al.*, Genome-scale functional characterization of Drosophila developmental enhancers in vivo. *Nature* **512**, 91-95 (2014).

39. H. Chen *et al.*, Dynamic interplay between enhancer–promoter topology and gene activity. *Nat. Genet.* **50**, 1296-1303 (2018).

40. J. N. Weiss, The Hill equation revisited: Uses and misuses. *FASEB J.* **11**, 835-841 (1997).

41. S. Bottani, R. A. Veitia, Hill function‐based models of transcriptional switches: Impact of specific, nonspecific, functional and nonfunctional binding. *Biol. Rev.* **92**, 953-963 (2017).

42. D. I. Cattoni *et al.*, Single-cell absolute contact probability detection reveals chromosomes are organized by multiple low-frequency yet specific interactions. *Nat. Commun.* **8**, 1753 (2017).

43. J. M. Alexander *et al.*, Live-cell imaging reveals enhancer-dependent Sox2 transcription in the absence of enhancer proximity. *eLife* **8**, e41769 (2019).

44. L. Barinov, S. Ryabichko, W. Bialek, T. Gregor, Transcription-dependent spatial organization of a gene locus. arXiv preprint (2020).

45. T. Heist, T. Fukaya, M. Levine, Large distances separate coregulated genes in living Drosophila embryos. *Proc. Natl. Acad. Sci. U.S.A.* **116**, 15062-15067 (2019).

46. J. P. Bothma *et al.*, Dynamic regulation of eve stripe 2 expression reveals transcriptional bursts in living Drosophila embryos. *Proc. Natl. Acad. Sci. U.S.A.* **111**, 10598-10603 (2014).

47. A. Berrocal, N. C. Lammers, H. G. Garcia, M. B. Eisen, Kinetic sculpting of the seven stripes of the Drosophila even-skipped gene. *eLife* **9**, e61635 (2020).

48. J. Falo-Sanjuan, N. C. Lammers, H. G. Garcia, S. J. Bray, Enhancer priming enables fast and sustained transcriptional responses to Notch signaling. *Dev. Cell* **50**, 411-425 (2019).

49. B. Zoller, S. C. Little, T. Gregor, Diverse spatial expression patterns emerge from unified kinetics of transcriptional bursting. *Cell* **175**, 835-847 (2018).

50. A. R. Krebs *et al.*, Genome-wide single-molecule footprinting reveals high RNA polymerase II turnover at paused promoters. *Mol. Cell* **67**, 411-422 (2017).

51. R. Milo, R. Phillips, *Cell biology by the numbers* (Garland Science, 2015).

52. T. O'Brien, J. T. Lis, Rapid changes in Drosophila transcription after an instantaneous heat shock. *Mol. Cell. Biol.* **13**, 3456-3463 (1993).

53. A. W. Shermoen, P. H. O'Farrell, Progression of the cell cycle through mitosis leads to abortion of nascent transcripts. *Cell* **67**, 303-310 (1991).

54. C. S. Thummel, K. C. Burtis, D. S. Hogness, Spatial and temporal patterns of E74 transcription during Drosophila development. *Cell* **61**, 101-111 (1990).

55. J. Yao, M. B. Ardehali, C. J. Fecko, W. W. Webb, J. T. Lis, Intranuclear distribution and local dynamics of RNA polymerase II during transcription activation. *Mol. Cell* **28**, 978-990 (2007).

56. T. Fukaya, B. Lim, M. Levine, Rapid rates of Pol II elongation in the Drosophila embryo. *Curr. Biol.* **27**, 1387-1391 (2017).

57. M. D. Adams *et al.*, The genome sequence of Drosophila melanogaster. *Science* **287**, 2185-2195 (2000).
